# Supplementary material for: Vitamin A supplementation among 9-59 month old children in India: geospatial perspectives and implications for targeted coverage
Source: HighWire-hosted journal article supplement (doi:10.1136/bmjgh-2021-007972), 2022-07-01
Supplement: bmjgh-2021-007972supp001_data_supplement.pdf [file bmjgh-2021-007972supp001_data_supplement.pdf]

## Supplementary material 1. State-wise prevalence of vitamin A deficiency (VAD) among children aged 1–5 years in India.

| State/ Union territory | VAD prevalence (%) <sup>†</sup> |
|------------------------|---------------------------------|
| Andhra Pradesh         | 16.9                            |
| Arunachal Pradesh      | 10.3                            |
| Assam                  | 17.9                            |
| Bihar                  | 22.8                            |
| Chhattisgarh           | 19.0                            |
| Delhi                  | 19.0                            |
| Goa                    | 1.9                             |
| Gujarat                | 12.7                            |
| Haryana                | 21.9                            |
| Himachal Pradesh       | 2.0                             |
| Jammu & Kashmir        | 7.5                             |
| Jharkhand              | 32.8                            |
| Karnataka              | 8.8                             |
| Kerala                 | 12.6                            |
| Madhya Pradesh         | 23.1                            |
| Maharashtra            | 10.3                            |
| Manipur                | 14.1                            |
| Meghalaya              | 5.7                             |
| Mizoram                | 40.8                            |
| Nagaland               | 5.3                             |
| Odisha                 | 16.4                            |
| Punjab                 | 15.5                            |
| Rajasthan              | 0.7                             |
| Sikkim                 | 4.0                             |
| Tamil Nadu             | 8.8                             |
| Telangana              | 28.6                            |
| Tripura                | 15.1                            |
| Uttar Pradesh          | 20.5                            |
| Uttarakhand            | 11.2                            |
| West Bengal            | 4.6                             |

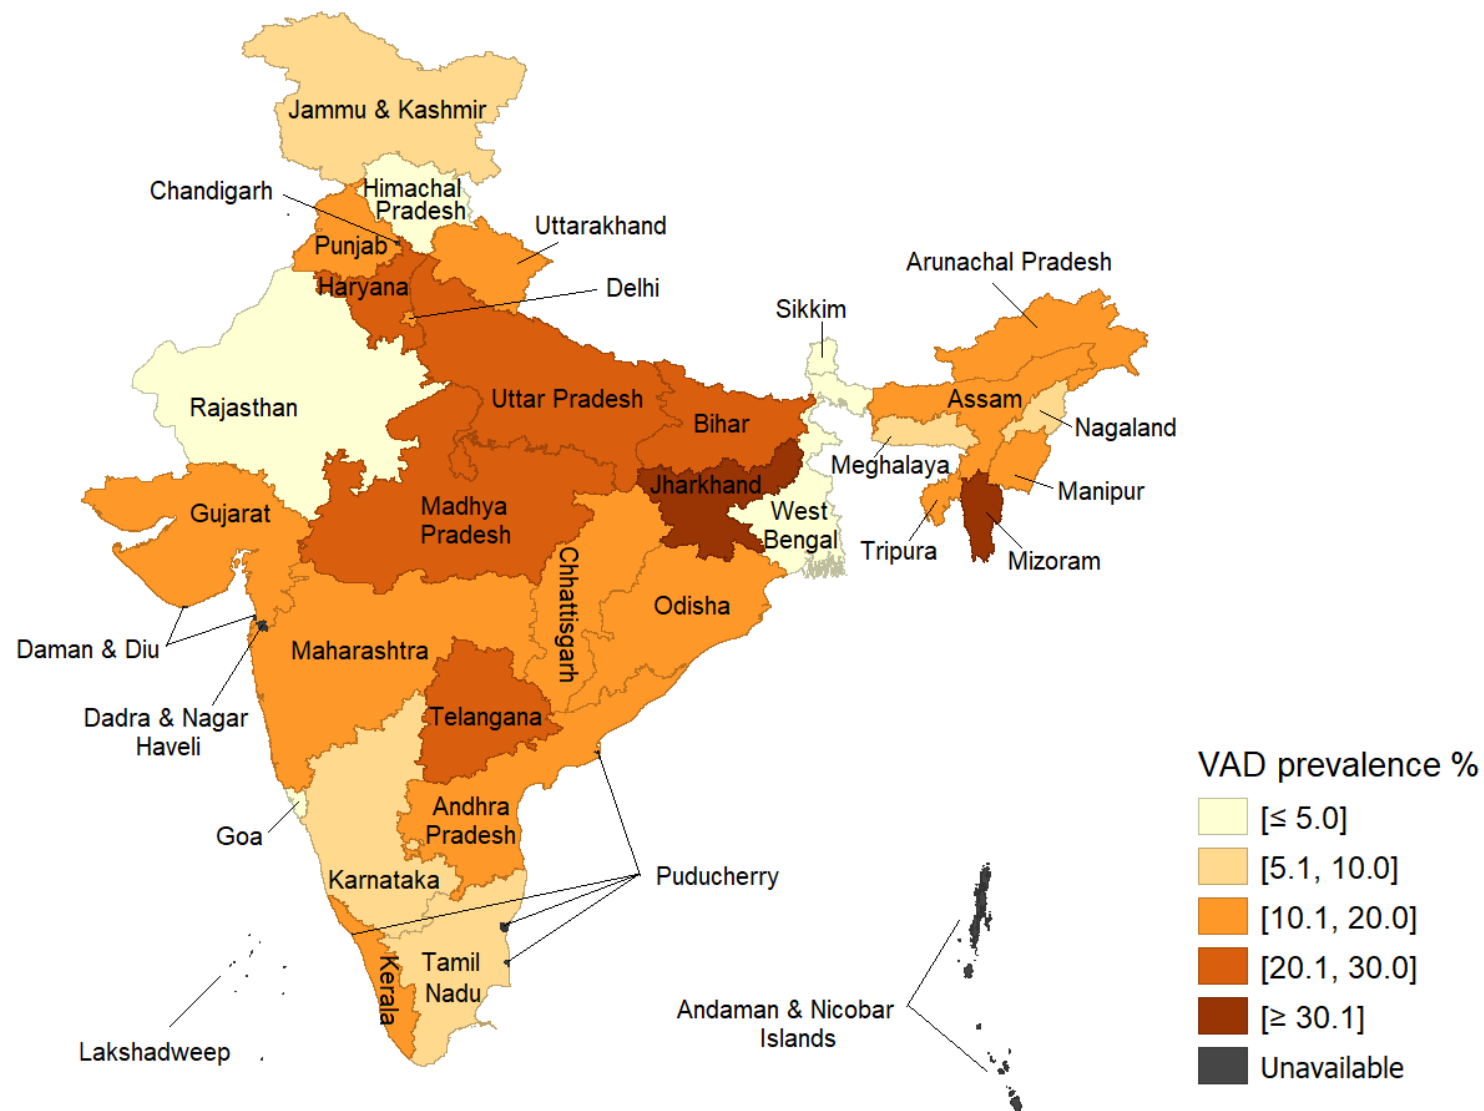

(Prevalence data on VAD was unavailable in Andaman & Nicobar Islands, Chandigarh, Daman & Diu, Dadra & Nagar Haveli, Lakshadweep, Puducherry)

<sup>†</sup> The estimates of VAD prevalence were available from the following report:

Reddy GB, Pullakhandam R, Ghosh S, Bioraju NK, Tattari S, Laxmaiah A, *et al.* (2021). Vitamin A deficiency among children younger than 5 y in India: an analysis of national data sets to reflect on the need for vitamin A supplementation. *Am J Clin Nutr*; 113: 939-947. <https://doi.org/10.1093/ajcn/nqaa314>
