# Supplementary material for: Vitamin A supplementation among 9-59 month old children in India: geospatial perspectives and implications for targeted coverage
Source: HighWire-hosted journal article supplement (doi:10.1136/bmjgh-2021-007972), 2022-07-01

Supplementary material 2. Choropleth maps showing coverage of vitamin A supplementation (VAS) on a continuous scale among children aged 9–59 months in India, 2015–16, across (A) states/union territories, and (B) districts.

### (A) State-level VAS coverage

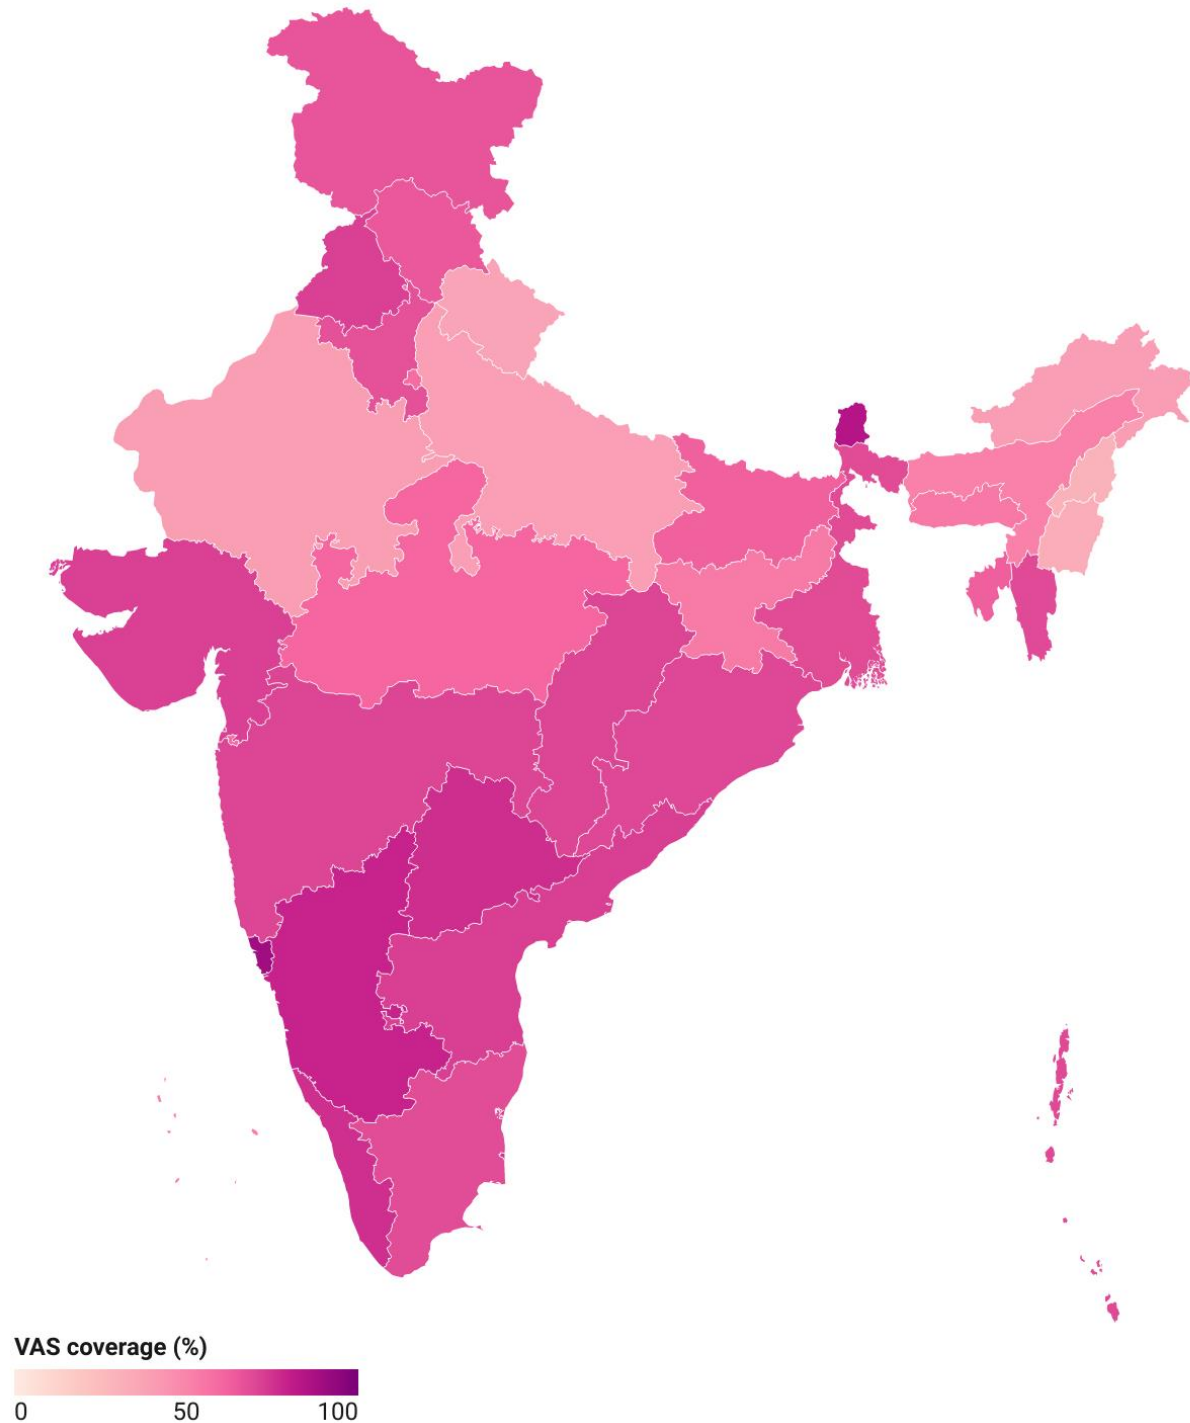

### (B) District-level VAS coverage

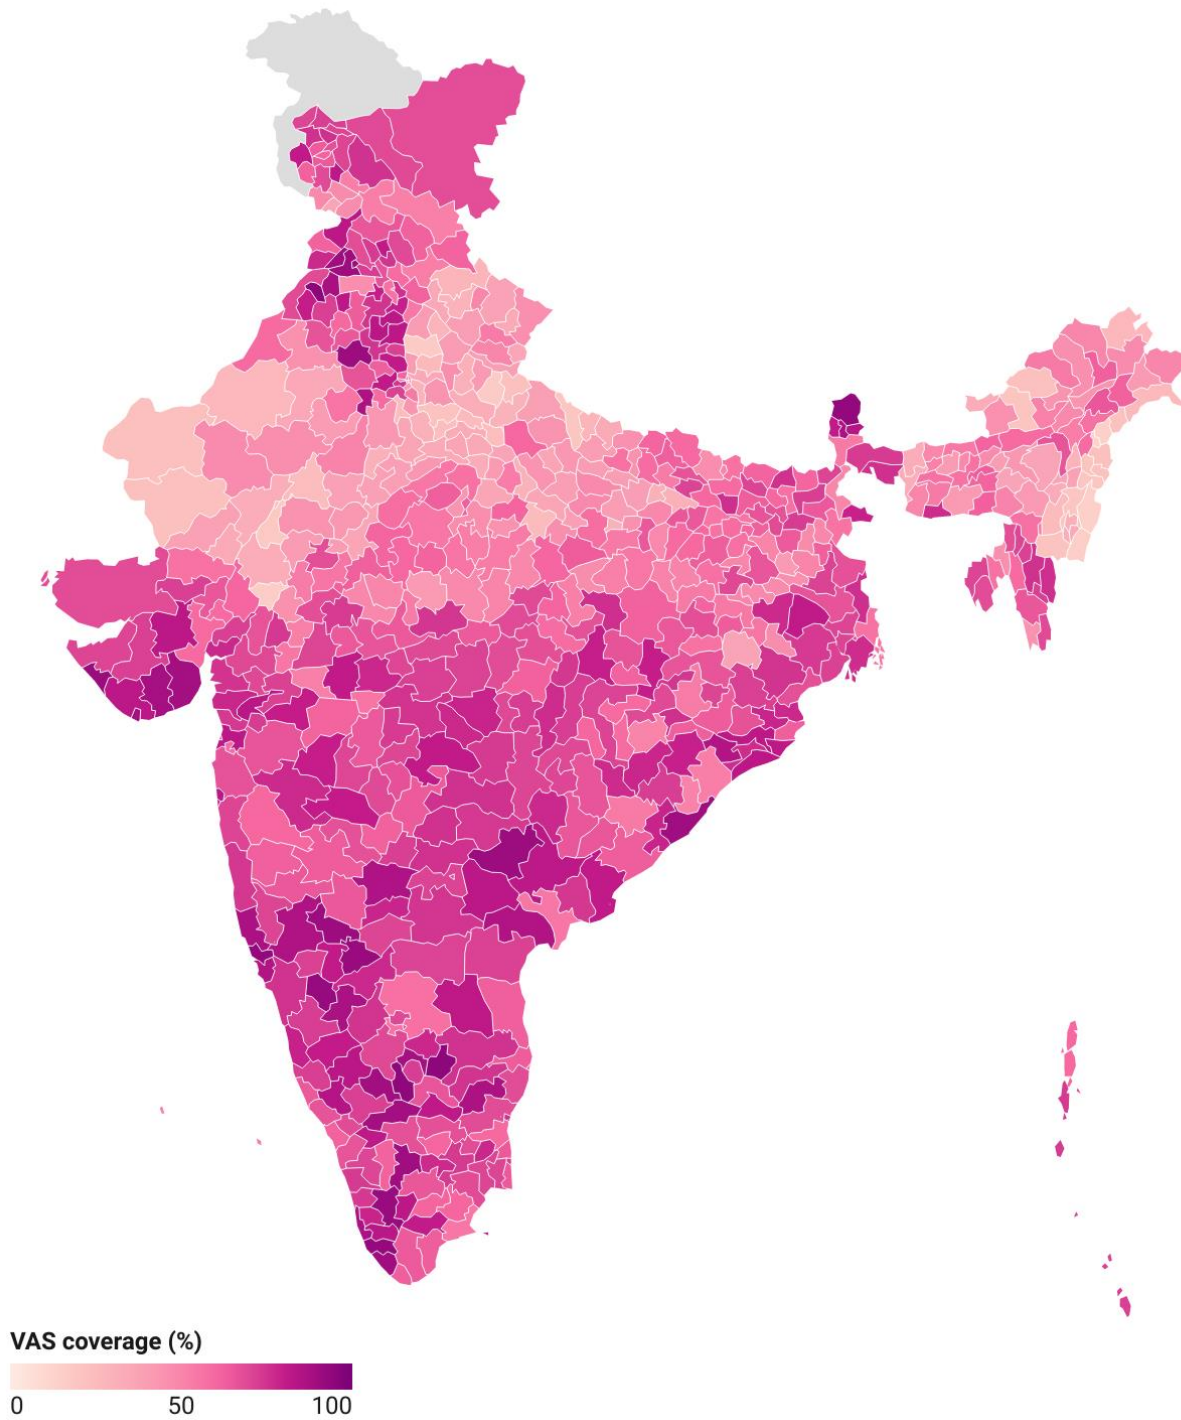

Supplement: bmjgh-2021-007972supp002_data_supplement.pdf [file bmjgh-2021-007972supp002_data_supplement.pdf]
