# Supplementary material for: Vitamin A supplementation among 9-59 month old children in India: geospatial perspectives and implications for targeted coverage
Source: HighWire-hosted journal article supplement (doi:10.1136/bmjgh-2021-007972), 2022-07-01

Supplementary material 3. Boxplots depicting coverage of vitamin A supplementation (VAS) among Indian children aged 9–59 months across (A) districts and states/union territories; and (B) districts within individual states/union territories.

### (A) VAS coverage in districts and states/union territories

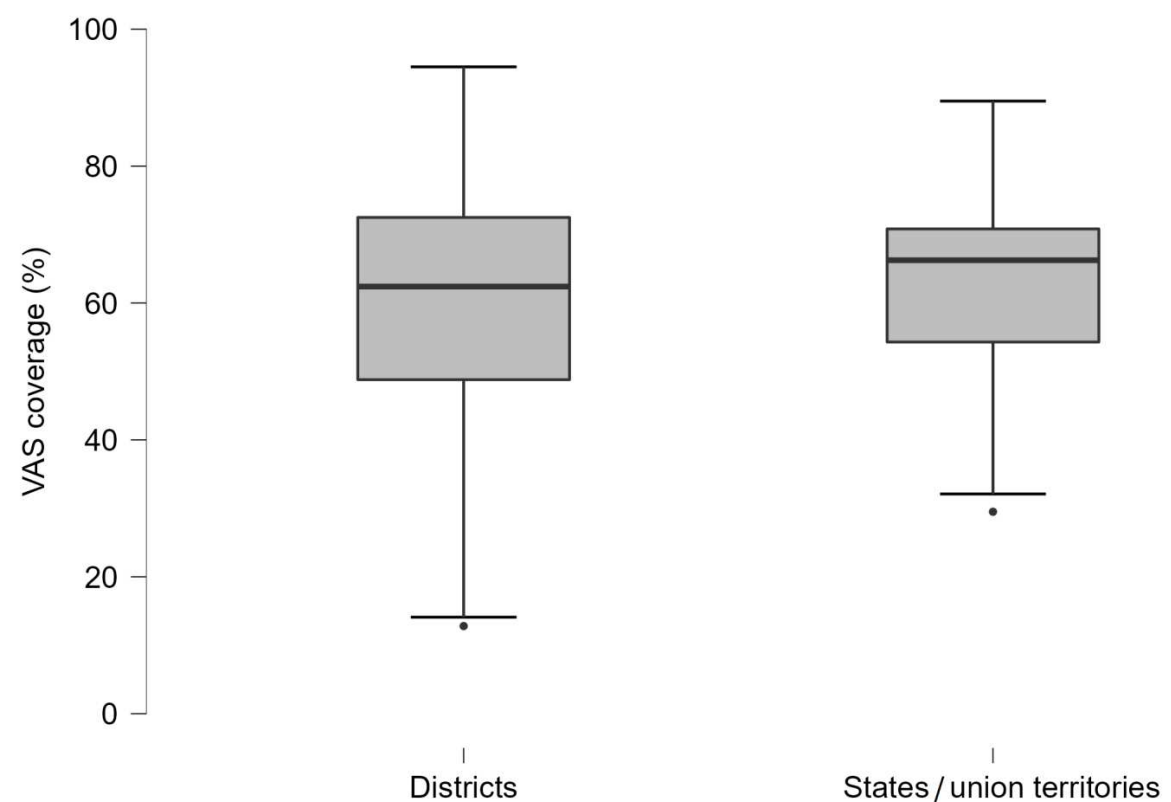

**(B) VAS coverage in districts within individual states/union territories**

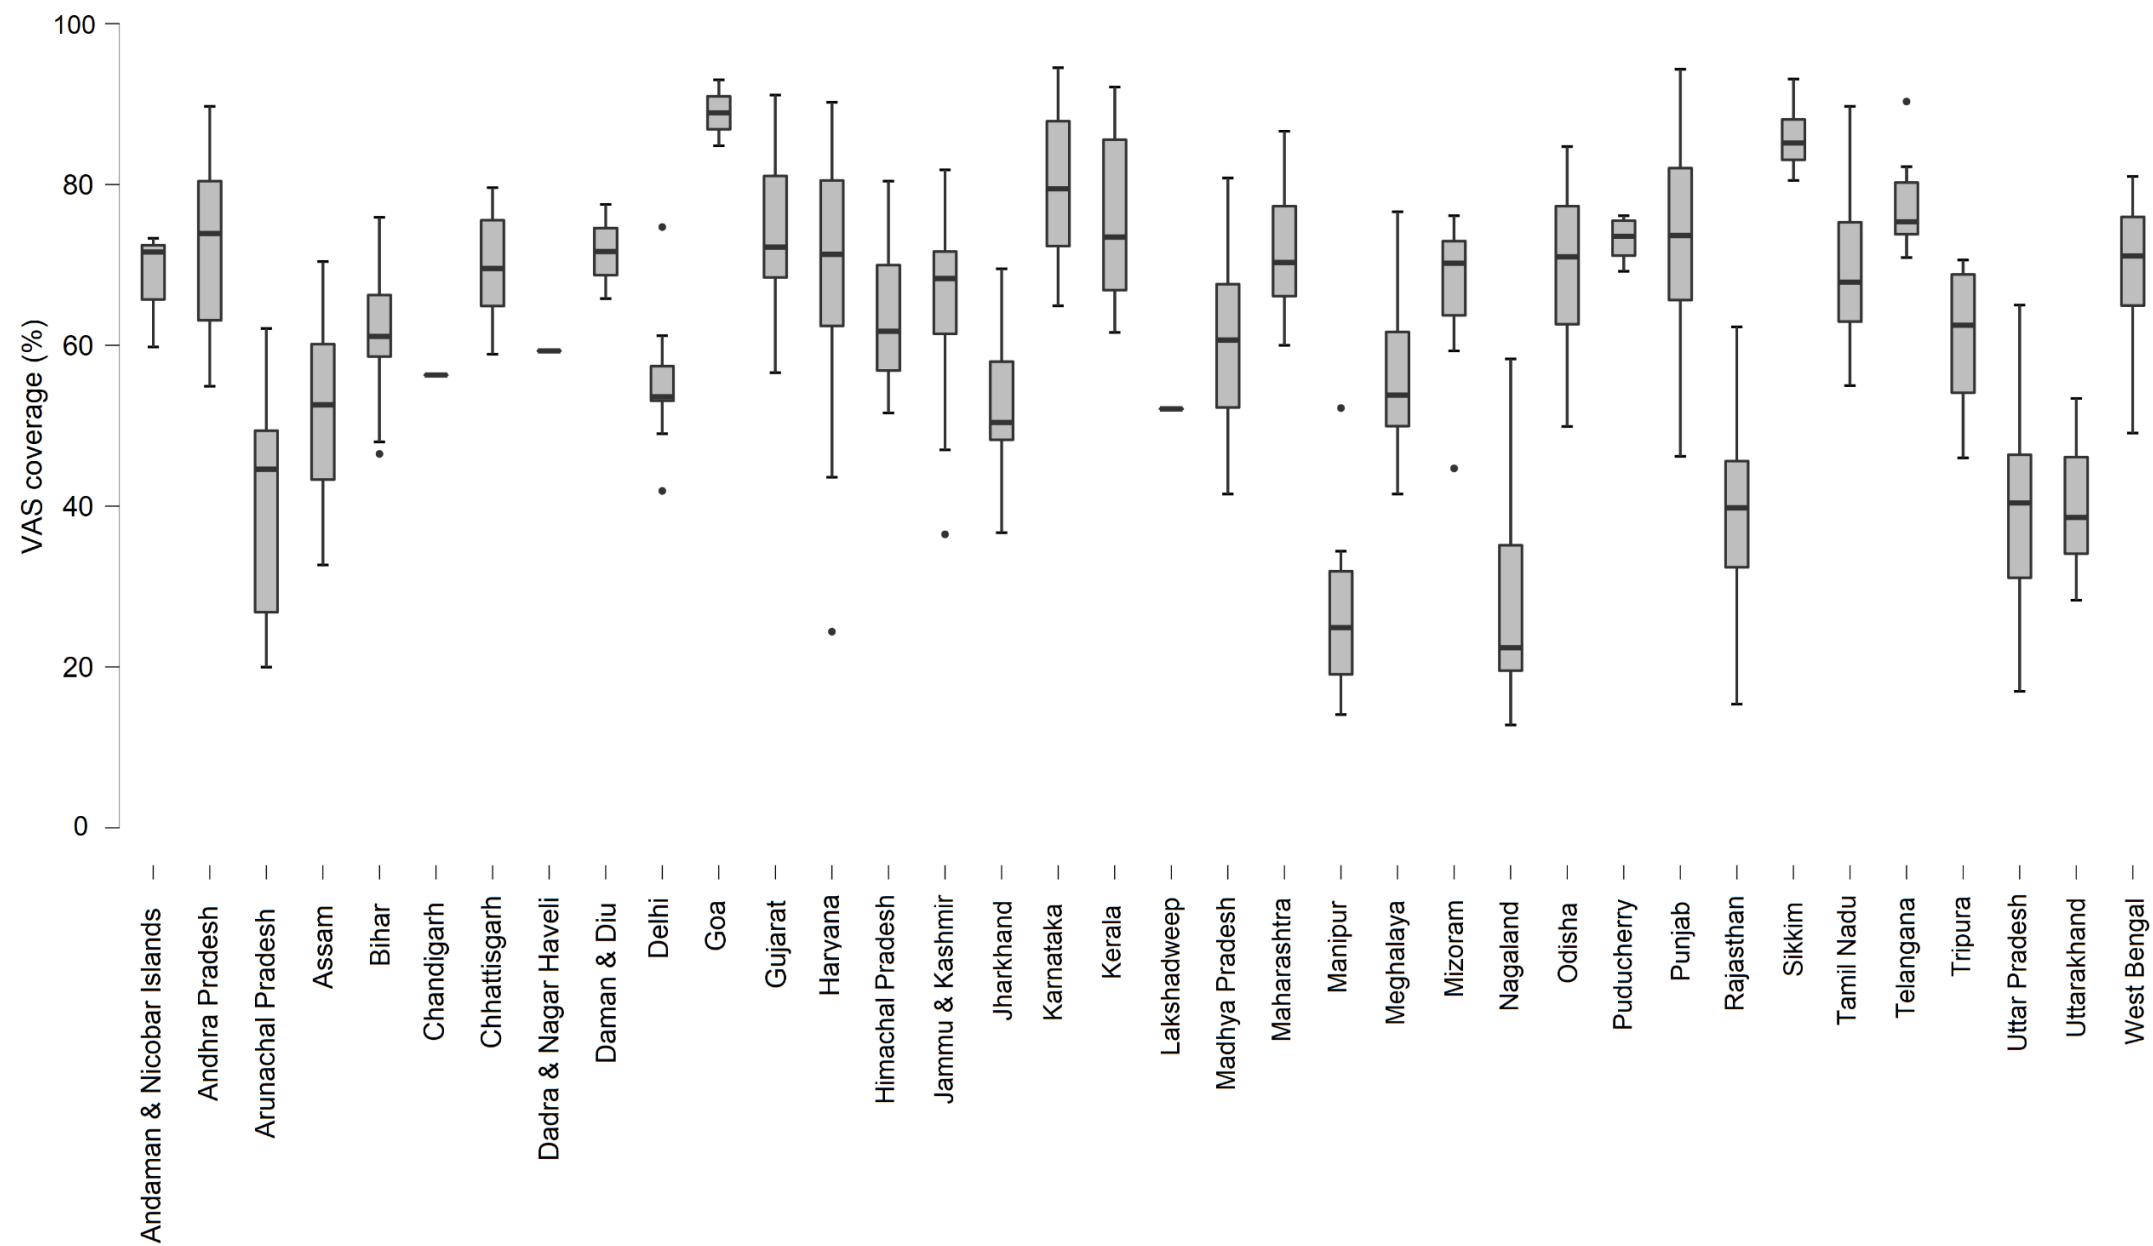

Supplement: bmjgh-2021-007972supp003_data_supplement.pdf [file bmjgh-2021-007972supp003_data_supplement.pdf]
